# Supplementary material
Source: PubMed Central journal article supplement (PMC8186852)
Supplement: mmc1.pdf [file mmc1.pdf]

# THE LANCET

## Rheumatology

### Supplementary appendix

This appendix formed part of the original submission and has been peer reviewed.  
We post it as supplied by the authors.

Supplement to: Rodriguez-Smith J J, Verweyen E L, Clay G M, et al. Inflammatory biomarkers in COVID-19-associated multisystem inflammatory syndrome in children, Kawasaki disease, and macrophage activation syndrome: a cohort study. *Lancet Rheumatol* 2021; published online June 8. [https://doi.org/10.1016/S2665-9913\(21\)00139-9](https://doi.org/10.1016/S2665-9913(21)00139-9).

**Appendix Table 1: Clinical manifestations, hospitalization details, and treatments by disease groups separated by sex**

|                        |             |              |            |              |            |              |              |              | Stratification of MIS-C group <sup>a</sup> |              |                   |              |
|------------------------|-------------|--------------|------------|--------------|------------|--------------|--------------|--------------|--------------------------------------------|--------------|-------------------|--------------|
|                        | SJIA (N=11) |              | MAS (N=9)  |              | KD (N=9)   |              | MIS-C (N=19) |              | Low CXCL9 (N=5)                            |              | High CXCL9 (N=10) |              |
|                        | Male (n=5)  | Female (n=6) | Male (n=5) | Female (n=4) | Male (n=2) | Female (n=7) | Male (n=11)  | Female (n=8) | Male (n=1)                                 | Female (n=4) | Male (n=5)        | Female (n=5) |
| Fever                  | 5 (100%)    | 6 (100%)     | 5 (100%)   | 4 (100%)     | 2 (100%)   | 7 (100%)     | 11 (100%)    | 8 (100%)     | 1 (100%)                                   | 4 (100%)     | 5 (100%)          | 5 (100%)     |
| Rash                   | 3 (60%)     | 5 (83%)      | 5 (100%)   | 4 (100%)     | 2 (100%)   | 5 (71%)      | 7 (64%)      | 5 (63%)      | 0 (0%)                                     | 3 (75%)      | 3 (60%)           | 3 (60%)      |
| Conjunctival injection | 0 (0%)      | 0 (0%)       | 0 (0%)     | 1 (25%)      | 1 (50%)    | 5 (71%)      | 7 (64%)      | 4 (50%)      | 0 (0%)                                     | 4 (100%)     | 3 (60%)           | 3 (60%)      |
| Mucositis              | 0 (0%)      | 1 (17%)      | 1 (20%)    | 0 (0%)       | 1 (50%)    | 6 (86%)      | 3 (27%)      | 4 (50%)      | 0 (0%)                                     | 1 (25%)      | 2 (40%)           | 4 (80%)      |
| Swelling of hands/feet | 0 (0%)      | 2 (33%)      | 0 (0%)     | 0 (0%)       | 1 (50%)    | 4 (57%)      | 3 (27%)      | 4 (50%)      | 0 (0%)                                     | 1 (25%)      | 2 (40%)           | 2 (40%)      |
| Adenopathy             | 2 (40%)     | 2 (33%)      | 4 (80%)    | 0 (0%)       | 1 (50%)    | 5 (71%)      | 5 (45%)      | 3 (38%)      | 0 (0%)                                     | 3 (75%)      | 1 (20%)           | 1 (20%)      |
| Abdominal pain         | 0 (0%)      | 1 (17%)      | 3 (60%)    | 2 (50%)      | 0 (0%)     | 0 (0%)       | 8 (73%)      | 5 (63%)      | 1 (100%)                                   | 3 (75%)      | 3 (60%)           | 3 (60%)      |
| Diarrhea               | 0 (0%)      | 1 (17%)      | 1 (20%)    | 0 (0%)       | 0 (0%)     | 3 (43%)      | 6 (55%)      | 4 (50%)      | 0 (0%)                                     | 3 (75%)      | 1 (20%)           | 4 (80%)      |
| Headache               | 1 (20%)     | 3 (50%)      | 1 (20%)    | 0 (0%)       | 0 (0%)     | 2 (29%)      | 8 (73%)      | 4 (50%)      | 1 (100%)                                   | 3 (75%)      | 4 (80%)           | 3 (60%)      |
| Respiratory symptoms   | 1 (20%)     | 2 (33%)      | 1 (20%)    | 1 (25%)      | 1 (50%)    | 2 (29%)      | 6 (55%)      | 4 (50%)      | 1 (100%)                                   | 3 (75%)      | 1 (20%)           | 3 (60%)      |
| Pharyngitis            | 1 (20%)     | 4 (67%)      | 0 (0%)     | 1 (25%)      | 0 (0%)     | 1 (14%)      | 5 (45%)      | 5 (63%)      | 0 (0%)                                     | 1 (25%)      | 3 (60%)           | 3 (60%)      |
| Arthritis              | 3 (60%)     | 3 (50%)      | 4 (80%)    | 2 (50%)      | 0 (0%)     | 2 (29%)      | 0 (0%)       | 0 (0%)       | 0 (0%)                                     | 0 (0%)       | 0 (0%)            | 0 (0%)       |
| Hepatomegaly           | 1 (20%)     | 0 (0%)       | 2 (40%)    | 1 (25%)      | 0 (0%)     | 1 (14%)      | 1 (9%)       | 1 (13%)      | 0 (0%)                                     | 0 (0%)       | 1 (20%)           | 1 (20%)      |
| Splenomegaly           | 1 (20%)     | 0 (0%)       | 2 (40%)    | 1 (25%)      | 0 (0%)     | 0 (0%)       | 1 (9%)       | 1 (13%)      | 0 (0%)                                     | 0 (0%)       | 1 (20%)           | 1 (20%)      |
| Acute kidney injury    | 0 (0%)      | 0 (0%)       | 0 (0%)     | 0 (0%)       | 0 (0%)     | 0 (0%)       | 3 (27%)      | 3 (38%)      | 0 (0%)                                     | 0 (0%)       | 3 (60%)           | 3 (60%)      |
| Shock*                 | 0 (0%)      | 0 (0%)       | 0 (0%)     | 0 (0%)       | 0 (0%)     | 4 (57%)      | 7 (64%)      | 6 (75%)      | 1 (100%)                                   | 1 (25%)      | 5 (100%)          | 4 (80%)      |
| requiring fluid bolus  | 0 (0%)      | 0 (0%)       | 0 (0%)     | 0 (0%)       | 0 (0%)     | 4 (57%)      | 7 (64%)      | 6 (75%)      | 1 (100%)                                   | 1 (25%)      | 5 (100%)          | 4 (80%)      |
| requiring inotropes    | 0 (0%)      | 0 (0%)       | 0 (0%)     | 0 (0%)       | 0 (0%)     | 1 (14%)      | 3 (27%)      | 2 (25%)      | 1 (100%)                                   | 0 (0%)       | 2 (40%)           | 1 (20%)      |
| Coronary changes       | 0 (0%)      | 0 (0%)       | 0 (0%)     | 0 (0%)       | 0 (0%)     | 4 (57%)      | 2 (18%)      | 0 (0%)       | 0 (0%)                                     | 2 (50%)      | 0 (0%)            | 0 (0%)       |
| Myocardial dysfunction | 0 (0%)      | 0 (0%)       | 0 (0%)     | 0 (0%)       | 0 (0%)     | 3 (43%)      | 4 (36%)      | 3 (38%)      | 0 (0%)                                     | 1 (25%)      | 3 (60%)           | 2 (40%)      |
| Respiratory support    | 1 (20%)     | 1 (17%)      | 0 (0%)     | 0 (0%)       | 0 (0%)     | 3 (43%)      | 7 (64%)      | 4 (50%)      | 1 (100%)                                   | 2 (50%)      | 4 (80%)           | 2 (40%)      |
| Oxygen only            | 0 (0%)      | 0 (0%)       | 0 (0%)     | 0 (0%)       | 0 (0%)     | 2 (29%)      | 7 (64%)      | 3 (38%)      | 1 (100%)                                   | 2 (50%)      | 4 (80%)           | 1 (20%)      |
| HFNC                   | 0 (0%)      | 0 (0%)       | 0 (0%)     | 0 (0%)       | 0 (0%)     | 1 (14%)      | 2 (18%)      | 1 (13%)      | 0 (0%)                                     | 0 (0%)       | 2 (40%)           | 1 (20%)      |
| CPAP or BiPAP          | 0 (0%)      | 0 (0%)       | 0 (0%)     | 0 (0%)       | 0 (0%)     | 0 (0%)       | 1 (9%)       | 0 (0%)       | 0 (0%)                                     | 0 (0%)       | 1 (20%)           | 0 (0%)       |
| Intubation ventilation | 0 (0%)      | 0 (0%)       | 0 (0%)     | 0 (0%)       | 0 (0%)     | 0 (0%)       | 0 (0%)       | 1 (13%)      | 0 (0%)                                     | 0 (0%)       | 0 (0%)            | 1 (20%)      |

|                         |         |         |                      |                      |          |          |         |          |          |          |          |          |
|-------------------------|---------|---------|----------------------|----------------------|----------|----------|---------|----------|----------|----------|----------|----------|
| Mental status changes   | 0 (0%)  | 0 (0%)  | 0 (0%)               | 0 (0%)               | 0 (0%)   | 0 (0%)   | 3 (27%) | 1 (13%)  | 0 (0%)   | 0 (0%)   | 3 (60%)  | 1 (20%)  |
| Treatments <sup>‡</sup> | 0 (0%)  | 2 (33%) | 5 (100%)             | 4 (100%)             | 2 (100%) | 7 (100%) | 9 (82%) | 8 (100%) | 1 (100%) | 4 (100%) | 5 (100%) | 5 (100%) |
| ICU care                | 0 (0%)  | 0 (0%)  | 1 (20%)              | 1 (25%)              | 0 (0%)   | 3 (43%)  | 6 (55%) | 6 (75%)  | 1 (100%) | 2 (50%)  | 3 (60%)  | 3 (60%)  |
| IVIg                    | 0 (0%)  | 1 (17%) | 0 (0%)               | 0 (0%)               | 2 (100%) | 7 (100%) | 9 (82%) | 8 (100%) | 1 (100%) | 4 (100%) | 5 (100%) | 5 (100%) |
| corticosteroids         | 0 (0%)  | 2 (33%) | 4 (80%)              | 4 (100%)             | 0 (0%)   | 5 (71%)  | 8 (73%) | 8 (100%) | 1 (100%) | 4 (100%) | 4 (80%)  | 5 (100%) |
| IL-1 inhibitor          | 0 (0%)  | 0 (0%)  | 5 (100%)             | 4 (100%)             | 0 (0%)   | 0 (0%)   | 3 (27%) | 2 (25%)  | 0 (0%)   | 1 (25%)  | 2 (40%)  | 1 (20%)  |
| Infliximab              | 0 (0%)  | 0 (0%)  | 0 (0%)               | 0 (0%)               | 0 (0%)   | 2 (29%)  | 0 (0%)  | 0 (0%)   | 0 (0%)   | 0 (0%)   | 0 (0%)   | 0 (0%)   |
| IL-6 inhibitor          | 0 (0%)  | 0 (0%)  | 0 (0%)               | 1 (25%)              | 0 (0%)   | 0 (0%)   | 0 (0%)  | 0 (0%)   | 0 (0%)   | 0 (0%)   | 0 (0%)   | 0 (0%)   |
| Other                   | 1 (20%) | 0 (0%)  | 2 (40%) <sup>†</sup> | 3 (75%) <sup>†</sup> | 0 (0%)   | 0 (0%)   | 0 (0%)  | 0 (0%)   | 0 (0%)   | 0 (0%)   | 0 (0%)   | 0 (0%)   |
| antibiotics             | 1 (20%) | 3 (50%) | 1 (20%)              | 0 (0%)               | 1 (50%)  | 6 (86%)  | 9 (82%) | 5 (63%)  | 0 (0%)   | 4 (100%) | 4 (80%)  | 3 (60%)  |
| antiviral               | 0 (0%)  | 0 (0%)  | 1 (20%)              | 0 (0%)               | 0 (0%)   | 0 (0%)   | 1 (9%)  | 0 (0%)   | 0 (0%)   | 1 (25%)  | 0 (0%)   | 0 (0%)   |

SJIA=systemic juvenile idiopathic arthritis, MAS=macrophage activation syndrome, KD=Kawasaki Disease, MIS-C=Multisystem inflammatory syndrome in Children

Biological female and male sex

Ω 15 of the 19 MIS-C patients who had CXCL9 measured were further stratified based on CXCL9 levels below and above 739pg/ml.

Data are n (%), unless noted otherwise, all patients were included in percentage calculations.

\* Shock is needing inotrope support or fluid resuscitation >20ml/kg;

‡ refers to IVIG, steroids, IL-1 inhibitor, infliximab, or IL-6 inhibitor

† other treatments refers cyclosporine (n=2) and emapulumab (n=3) e Before admission, some MAS patients received following: tofacitinib and cyclophosphamide n=1; etoposide n=1; tocilizumab n=1

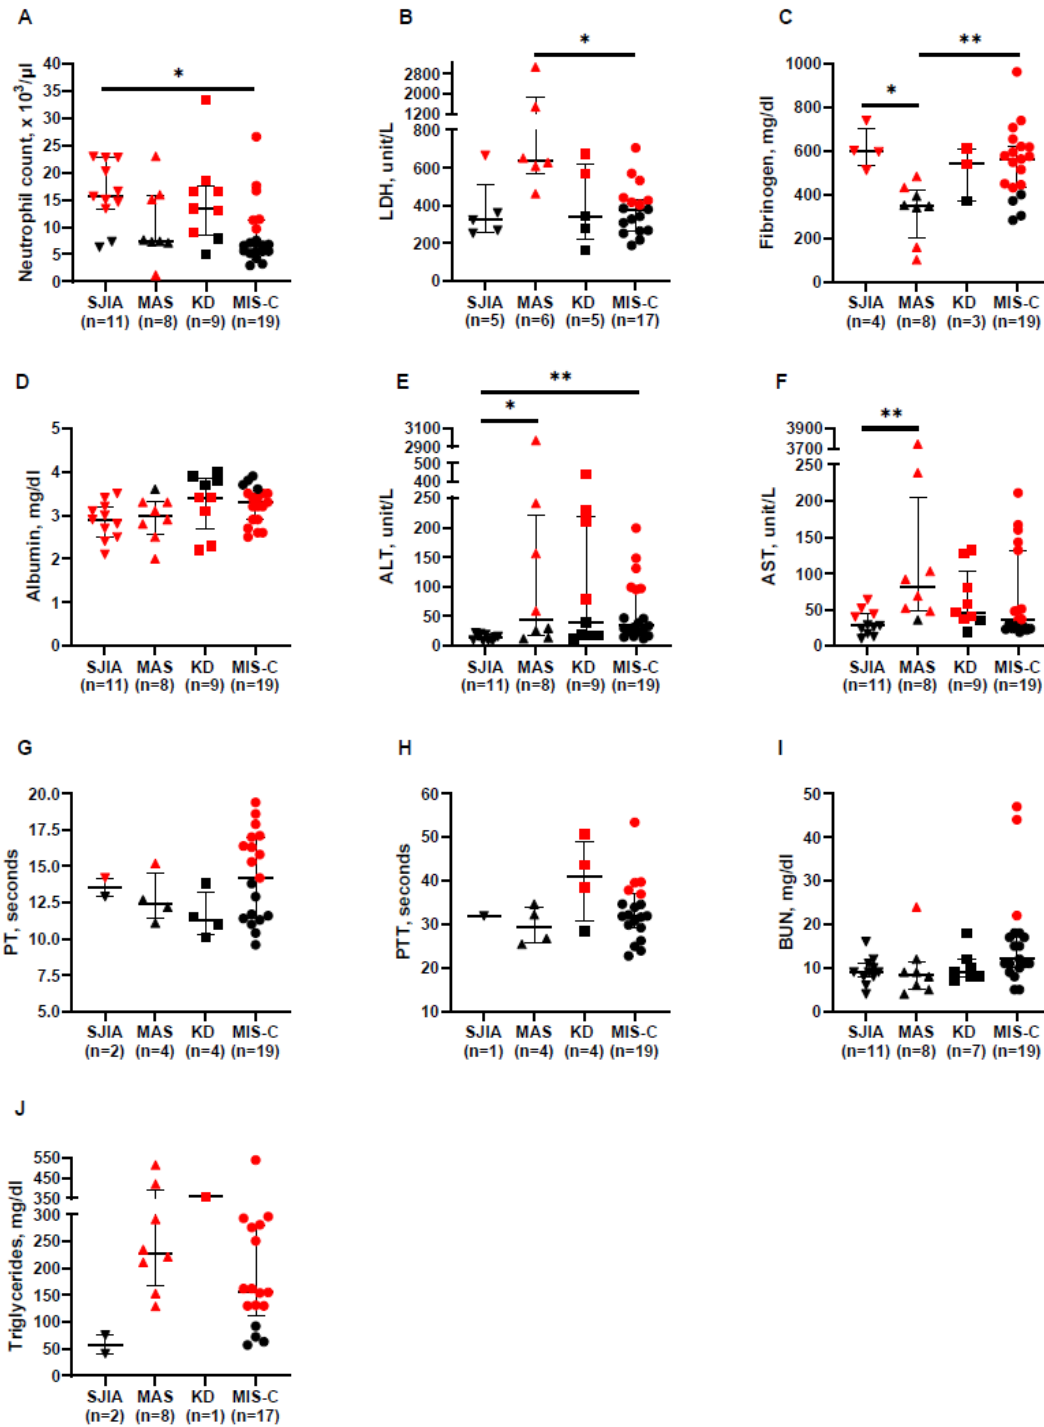

**Appendix Figure 1: Comparison of hematology and laboratory results by disease groups.** All data are first sets of labs obtained during admission. Red data points indicate outside the normal range for specific study. Data analyzed between SJIA vs MAS, MIS-C vs SJIA, MIS-C vs MAS, MIS-C vs KD using one-way ANOVA if data was parametric or Kruskal-Wallis if nonparametric and post hoc multiple comparison correction were made. Reported are median with 25 and 75% interquartile ranges (IQR) \*  $p \leq 0.05$ , \*\*  $p \leq 0.01$ , \*\*\*  $p \leq 0.001$ , \*\*\*\*  $p \leq 0.0001$

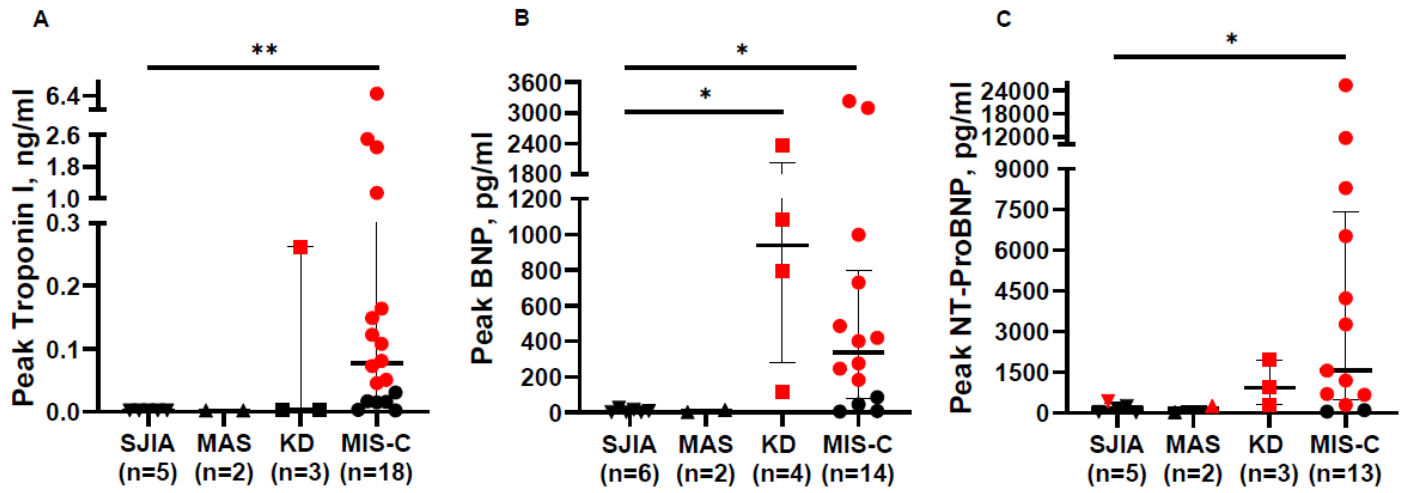

**Appendix Figure 2: Comparison of cardiac markers by disease group.** All data are peak values reported during admission. Red data points indicate outside the normal range for specific study. Data analyzed between SJIA vs MAS, SJIA vs KD, MIS-C vs SJIA, MIS-C vs MAS, MIS-C vs KD using one-way ANOVA if data was parametric or Kruskal-Wallis if nonparametric and post hoc multiple comparison correction were made. Reported are median with 25 and 75% interquartile ranges (IQR) \*  $p \leq 0.05$ , \*\*  $p \leq 0.01$ , \*\*\*  $p \leq 0.001$ , \*\*\*\*  $p \leq 0.0001$

**Appendix Table 2. Cut-off values of CXCL9 for the differentiation between MISC and KD and their coordinates on ROC analysis**

|         | Sensitivity % | 95% CI           | Specificity % | 95% CI           | Likelihood ratio |
|---------|---------------|------------------|---------------|------------------|------------------|
| > 54.00 | 100.0         | 79.61% to 100.0% | 20.00         | 1.026% to 62.45% | 1.250            |
| > 147.0 | 100.0         | 79.61% to 100.0% | 40.00         | 7.107% to 76.93% | 1.667            |
| > 256.0 | 93.33         | 70.18% to 99.66% | 40.00         | 7.107% to 76.93% | 1.556            |
| > 350.5 | 93.33         | 70.18% to 99.66% | 60.00         | 23.07% to 92.89% | 2.333            |
| > 477.0 | 93.33         | 70.18% to 99.66% | 80.00         | 37.55% to 98.97% | 4.667            |
| > 535.0 | 93.33         | 70.18% to 99.66% | 100.0         | 56.55% to 100.0% |                  |
| > 558.0 | 86.67         | 62.12% to 97.63% | 100.0         | 56.55% to 100.0% |                  |
| > 590.5 | 80.00         | 54.81% to 92.95% | 100.0         | 56.55% to 100.0% |                  |
| > 738.5 | 66.67         | 41.71% to 84.82% | 100.0         | 56.55% to 100.0% |                  |
| > 1040  | 60.00         | 35.75% to 80.18% | 100.0         | 56.55% to 100.0% |                  |
| > 1469  | 53.33         | 30.12% to 75.19% | 100.0         | 56.55% to 100.0% |                  |
| > 2534  | 46.67         | 24.81% to 69.88% | 100.0         | 56.55% to 100.0% |                  |
| > 3460  | 40.00         | 19.82% to 64.25% | 100.0         | 56.55% to 100.0% |                  |
| > 4547  | 33.33         | 15.18% to 58.29% | 100.0         | 56.55% to 100.0% |                  |
| > 5905  | 26.67         | 10.90% to 51.95% | 100.0         | 56.55% to 100.0% |                  |
| > 6877  | 20.00         | 7.048% to 45.19% | 100.0         | 56.55% to 100.0% |                  |
| > 7650  | 13.33         | 2.369% to 37.88% | 100.0         | 56.55% to 100.0% |                  |

**Appendix Table 3. Cut-off values of S100A8/A9 for the differentiation between SJIA and KD and their coordinates on ROC analysis**

|          | Sensitivity % | 95% CI          | Specificity % | 95% CI          | Likelihood ratio |
|----------|---------------|-----------------|---------------|-----------------|------------------|
| > 6007   | 100           | 72.2% to 100%   | 12.5          | 0.641% to 47.1% | 1.14             |
| > 6881   | 100           | 72.2% to 100%   | 25.0          | 4.44% to 59.1%  | 1.33             |
| > 10389  | 100           | 72.2% to 100%   | 37.5          | 13.7% to 69.4%  | 1.60             |
| > 16504  | 100           | 72.2% to 100%   | 50.0          | 21.5% to 78.5%  | 2.00             |
| > 21823  | 100           | 72.2% to 100%   | 62.5          | 30.6% to 86.3%  | 2.67             |
| > 25124  | 100           | 72.2% to 100%   | 75.0          | 40.9% to 95.6%  | 4.00             |
| > 27673  | 100           | 72.2% to 100%   | 87.5          | 52.9% to 99.4%  | 8.00             |
| > 29577  | 100           | 72.2% to 100%   | 100           | 67.6% to 100%   |                  |
| > 32701  | 90.0          | 59.6% to 99.5%  | 100           | 67.6% to 100%   |                  |
| > 37592  | 80.0          | 49.0% to 96.4%  | 100           | 67.6% to 100%   |                  |
| > 43414  | 70.0          | 39.7% to 89.2%  | 100           | 67.6% to 100%   |                  |
| > 56879  | 60.0          | 31.3% to 83.2%  | 100           | 67.6% to 100%   |                  |
| > 76983  | 50.0          | 23.7% to 76.3%  | 100           | 67.6% to 100%   |                  |
| > 94003  | 40.0          | 16.8% to 68.7%  | 100           | 67.6% to 100%   |                  |
| > 101581 | 30.0          | 10.8% to 60.3%  | 100           | 67.6% to 100%   |                  |
| > 113583 | 20.0          | 3.55% to 51.0%  | 100           | 67.6% to 100%   |                  |
| > 162248 | 10.0          | 0.513% to 40.4% | 100           | 67.6% to 100%   |                  |

**Appendix Table 4. Cut off values of S100A12 for the differentiation between SJIA and KD and their Coordinates on ROC analysis**

|         | Sensitivity % | 95% CI            | Specificity % | 95% CI            | Likelihood ratio |
|---------|---------------|-------------------|---------------|-------------------|------------------|
| > 171.0 | 100.0         | 72.25% to 100.0%  | 12.50         | 0.6412% to 47.09% | 1.143            |
| > 346.5 | 100.0         | 72.25% to 100.0%  | 25.00         | 4.442% to 59.07%  | 1.333            |
| > 560.5 | 100.0         | 72.25% to 100.0%  | 37.50         | 13.68% to 69.43%  | 1.600            |
| > 926.0 | 100.0         | 72.25% to 100.0%  | 50.00         | 21.52% to 78.48%  | 2.000            |
| > 1458  | 100.0         | 72.25% to 100.0%  | 62.50         | 30.57% to 86.32%  | 2.667            |
| > 1762  | 100.0         | 72.25% to 100.0%  | 75.00         | 40.93% to 95.56%  | 4.000            |
| > 1827  | 100.0         | 72.25% to 100.0%  | 87.50         | 52.91% to 99.36%  | 8.000            |
| > 1984  | 100.0         | 72.25% to 100.0%  | 100.0         | 67.56% to 100.0%  |                  |
| > 2325  | 90.00         | 59.58% to 99.49%  | 100.0         | 67.56% to 100.0%  |                  |
| > 2864  | 80.00         | 49.02% to 96.45%  | 100.0         | 67.56% to 100.0%  |                  |
| > 4522  | 70.00         | 39.68% to 89.22%  | 100.0         | 67.56% to 100.0%  |                  |
| > 6719  | 60.00         | 31.27% to 83.18%  | 100.0         | 67.56% to 100.0%  |                  |
| > 7562  | 50.00         | 23.66% to 76.34%  | 100.0         | 67.56% to 100.0%  |                  |
| > 9700  | 40.00         | 16.82% to 68.73%  | 100.0         | 67.56% to 100.0%  |                  |
| > 12591 | 30.00         | 10.78% to 60.32%  | 100.0         | 67.56% to 100.0%  |                  |
| > 14464 | 20.00         | 3.554% to 50.98%  | 100.0         | 67.56% to 100.0%  |                  |
| > 17133 | 10.00         | 0.5129% to 40.42% | 100.0         | 67.56% to 100.0%  |                  |

**Appendix Table 5. Cut off values of IL-18 for the differentiation between SJIA and KD and their Coordinates on ROC analysis**

|          | Sensitivity % | 95% CI            | Specificity % | 95% CI            | Likelihood ratio |
|----------|---------------|-------------------|---------------|-------------------|------------------|
| > 242.5  | 100.0         | 74.12% to 100.0%  | 14.29         | 0.7328% to 51.31% | 1.167            |
| > 310.0  | 100.0         | 74.12% to 100.0%  | 28.57         | 5.077% to 64.11%  | 1.400            |
| > 466.5  | 100.0         | 74.12% to 100.0%  | 42.86         | 15.82% to 74.95%  | 1.750            |
| > 837.5  | 100.0         | 74.12% to 100.0%  | 57.14         | 25.05% to 84.18%  | 2.333            |
| > 1315   | 100.0         | 74.12% to 100.0%  | 71.43         | 35.89% to 94.92%  | 3.500            |
| > 1593   | 100.0         | 74.12% to 100.0%  | 85.71         | 48.69% to 99.27%  | 7.000            |
| > 2632   | 100.0         | 74.12% to 100.0%  | 100.0         | 64.57% to 100.0%  |                  |
| > 5413   | 90.91         | 62.26% to 99.53%  | 100.0         | 64.57% to 100.0%  |                  |
| > 7757   | 81.82         | 52.30% to 96.77%  | 100.0         | 64.57% to 100.0%  |                  |
| > 13100  | 72.73         | 43.44% to 90.25%  | 100.0         | 64.57% to 100.0%  |                  |
| > 18643  | 63.64         | 35.38% to 84.83%  | 100.0         | 64.57% to 100.0%  |                  |
| > 27347  | 54.55         | 28.01% to 78.73%  | 100.0         | 64.57% to 100.0%  |                  |
| > 51909  | 45.45         | 21.27% to 71.99%  | 100.0         | 64.57% to 100.0%  |                  |
| > 70469  | 36.36         | 15.17% to 64.62%  | 100.0         | 64.57% to 100.0%  |                  |
| > 82115  | 27.27         | 9.746% to 56.56%  | 100.0         | 64.57% to 100.0%  |                  |
| > 109455 | 18.18         | 3.231% to 47.70%  | 100.0         | 64.57% to 100.0%  |                  |
| > 136128 | 9.091         | 0.4663% to 37.74% | 100.0         | 64.57% to 100.0%  |                  |

**Appendix Table 6 . Cut off values of CXCL9 for the differentiation between MIS-C patients with strict MAS versus MIS-C patients in no MAS and their Coordinates on ROC analysis**

|         | Sensitivity % | 95% CI            | Specificity % | 95% CI            | Likelihood ratio |
|---------|---------------|-------------------|---------------|-------------------|------------------|
| > 386.6 | 100.0         | 60.97% to 100.0%  | 11.11         | 0.5699% to 43.50% | 1.125            |
| > 558.1 | 100.0         | 60.97% to 100.0%  | 22.22         | 3.948% to 54.74%  | 1.286            |
| > 590.5 | 100.0         | 60.97% to 100.0%  | 33.33         | 12.06% to 64.58%  | 1.500            |
| > 604.5 | 100.0         | 60.97% to 100.0%  | 44.44         | 18.88% to 73.33%  | 1.800            |
| > 739.0 | 100.0         | 60.97% to 100.0%  | 55.56         | 26.67% to 81.12%  | 2.250            |
| > 1040  | 83.33         | 43.65% to 99.15%  | 55.56         | 26.67% to 81.12%  | 1.875            |
| > 1469  | 83.33         | 43.65% to 99.15%  | 66.67         | 35.42% to 87.94%  | 2.500            |
| > 2534  | 83.33         | 43.65% to 99.15%  | 77.78         | 45.26% to 96.05%  | 3.750            |
| > 3460  | 83.33         | 43.65% to 99.15%  | 88.89         | 56.50% to 99.43%  | 7.500            |
| > 4547  | 66.67         | 30.00% to 94.08%  | 88.89         | 56.50% to 99.43%  | 6.000            |
| > 5905  | 50.00         | 18.76% to 81.24%  | 88.89         | 56.50% to 99.43%  | 4.500            |
| > 6877  | 33.33         | 5.923% to 70.00%  | 88.89         | 56.50% to 99.43%  | 3.000            |
| > 7650  | 16.67         | 0.8549% to 56.35% | 88.89         | 56.50% to 99.43%  | 1.500            |
| > 9451  | 16.67         | 0.8549% to 56.35% | 100.0         | 70.09% to 100.0%  |                  |

**Appendix Table 7. Cut off values of CXCL9 for the differentiation between MIS-C patients with strict MAS and subclinical MAS versus MIS-C patients with no MAS**

|         | Sensitivity % | 95% CI            | Specificity % | 95% CI            | Likelihood ratio |
|---------|---------------|-------------------|---------------|-------------------|------------------|
| > 386.6 | 100.0         | 70.09% to 100.0%  | 16.67         | 0.8549% to 56.35% | 1.200            |
| > 558.1 | 100.0         | 70.09% to 100.0%  | 33.33         | 5.923% to 70.00%  | 1.500            |
| > 590.5 | 100.0         | 70.09% to 100.0%  | 50.00         | 18.76% to 81.24%  | 2.000            |
| > 604.5 | 100.0         | 70.09% to 100.0%  | 66.67         | 30.00% to 94.08%  | 3.000            |
| > 739.0 | 100.0         | 70.09% to 100.0%  | 83.33         | 43.65% to 99.15%  | 6.000            |
| > 1040  | 88.89         | 56.50% to 99.43%  | 83.33         | 43.65% to 99.15%  | 5.333            |
| > 1469  | 77.78         | 45.26% to 96.05%  | 83.33         | 43.65% to 99.15%  | 4.667            |
| > 2534  | 66.67         | 35.42% to 87.94%  | 83.33         | 43.65% to 99.15%  | 4.000            |
| > 3460  | 66.67         | 35.42% to 87.94%  | 100.0         | 60.97% to 100.0%  |                  |
| > 4547  | 55.56         | 26.67% to 81.12%  | 100.0         | 60.97% to 100.0%  |                  |
| > 5905  | 44.44         | 18.88% to 73.33%  | 100.0         | 60.97% to 100.0%  |                  |
| > 6877  | 33.33         | 12.06% to 64.58%  | 100.0         | 60.97% to 100.0%  |                  |
| > 7650  | 22.22         | 3.948% to 54.74%  | 100.0         | 60.97% to 100.0%  |                  |
| > 9451  | 11.11         | 0.5699% to 43.50% | 100.0         | 60.97% to 100.0%  |                  |

**Appendix Table 8 . Demographics of MIS-C patient with CXCL9 levels below and above 739pg/ml**

|                                                                                                                                                                                                                                                                                                                                                                                                            | <b>Lower CXCL9 (N=5)</b> | <b>Higher CXCL9 (N=10)</b> |
|------------------------------------------------------------------------------------------------------------------------------------------------------------------------------------------------------------------------------------------------------------------------------------------------------------------------------------------------------------------------------------------------------------|--------------------------|----------------------------|
|                                                                                                                                                                                                                                                                                                                                                                                                            | <b>n (%)</b>             | <b>n (%)</b>               |
| Female <sup>§</sup>                                                                                                                                                                                                                                                                                                                                                                                        | 1 (20%)                  | 5 (50%)                    |
| Male <sup>§</sup>                                                                                                                                                                                                                                                                                                                                                                                          | 4 (80%)                  | 5 (50%)                    |
| Age, median (IQR), years*                                                                                                                                                                                                                                                                                                                                                                                  | 9 (7-11)                 | 9 (4.5-15)                 |
| Hispanic                                                                                                                                                                                                                                                                                                                                                                                                   | 0 (0%)                   | 3 (30%)                    |
| White                                                                                                                                                                                                                                                                                                                                                                                                      | 3 (60%)                  | 3 (30%)                    |
| Black                                                                                                                                                                                                                                                                                                                                                                                                      | 2 (40%)                  | 4 (40%)                    |
| Asian                                                                                                                                                                                                                                                                                                                                                                                                      | 0 (0%)                   | 0 (0%)                     |
| Native American                                                                                                                                                                                                                                                                                                                                                                                            | 0 (0%)                   | 0 (0%)                     |
| Pre-existing conditions                                                                                                                                                                                                                                                                                                                                                                                    | 2 (40%)                  | 5 (50%)                    |
| Days of symptoms until admission, median (IQR)*                                                                                                                                                                                                                                                                                                                                                            | 6 (5-19)                 | 5.5 (4-8)                  |
| Reported COVID19 exposure                                                                                                                                                                                                                                                                                                                                                                                  | 2 (40%)                  | 7 (70%)                    |
| SARS-COV-2 serology (+)                                                                                                                                                                                                                                                                                                                                                                                    | 3 (60%)                  | 6 (60%)                    |
| Nasopharyngeal swab PCR (+)                                                                                                                                                                                                                                                                                                                                                                                | 1 (20%)                  | 4 (40%)                    |
| Reported COVID19 exposure or/and (+) testing                                                                                                                                                                                                                                                                                                                                                               | 4 (80%)                  | 9 (90%)                    |
| Met complete Kawasaki criteria                                                                                                                                                                                                                                                                                                                                                                             | 1 (20%)                  | 3 (30%)                    |
| Met macrophage activation syndrome (MAS) criteria <sup>‡</sup>                                                                                                                                                                                                                                                                                                                                             | 0 (0%)                   | 6 (60%)                    |
| Unless noted otherwise, all patients were included in percentage calculations.<br>*Values reported for age and duration of symptoms are in median with 25% and 75% interquartile ranges (IQR)<br>§ biological sex<br>‡ MAS criteria based on ferritin >684 ng/ml and two of the following: platelets $\leq 181 \times 10^9$ per L, AST >48, triglycerides $\geq 156$ mg/dl and fibrinogen $\leq 360$ mg/dl |                          |                            |



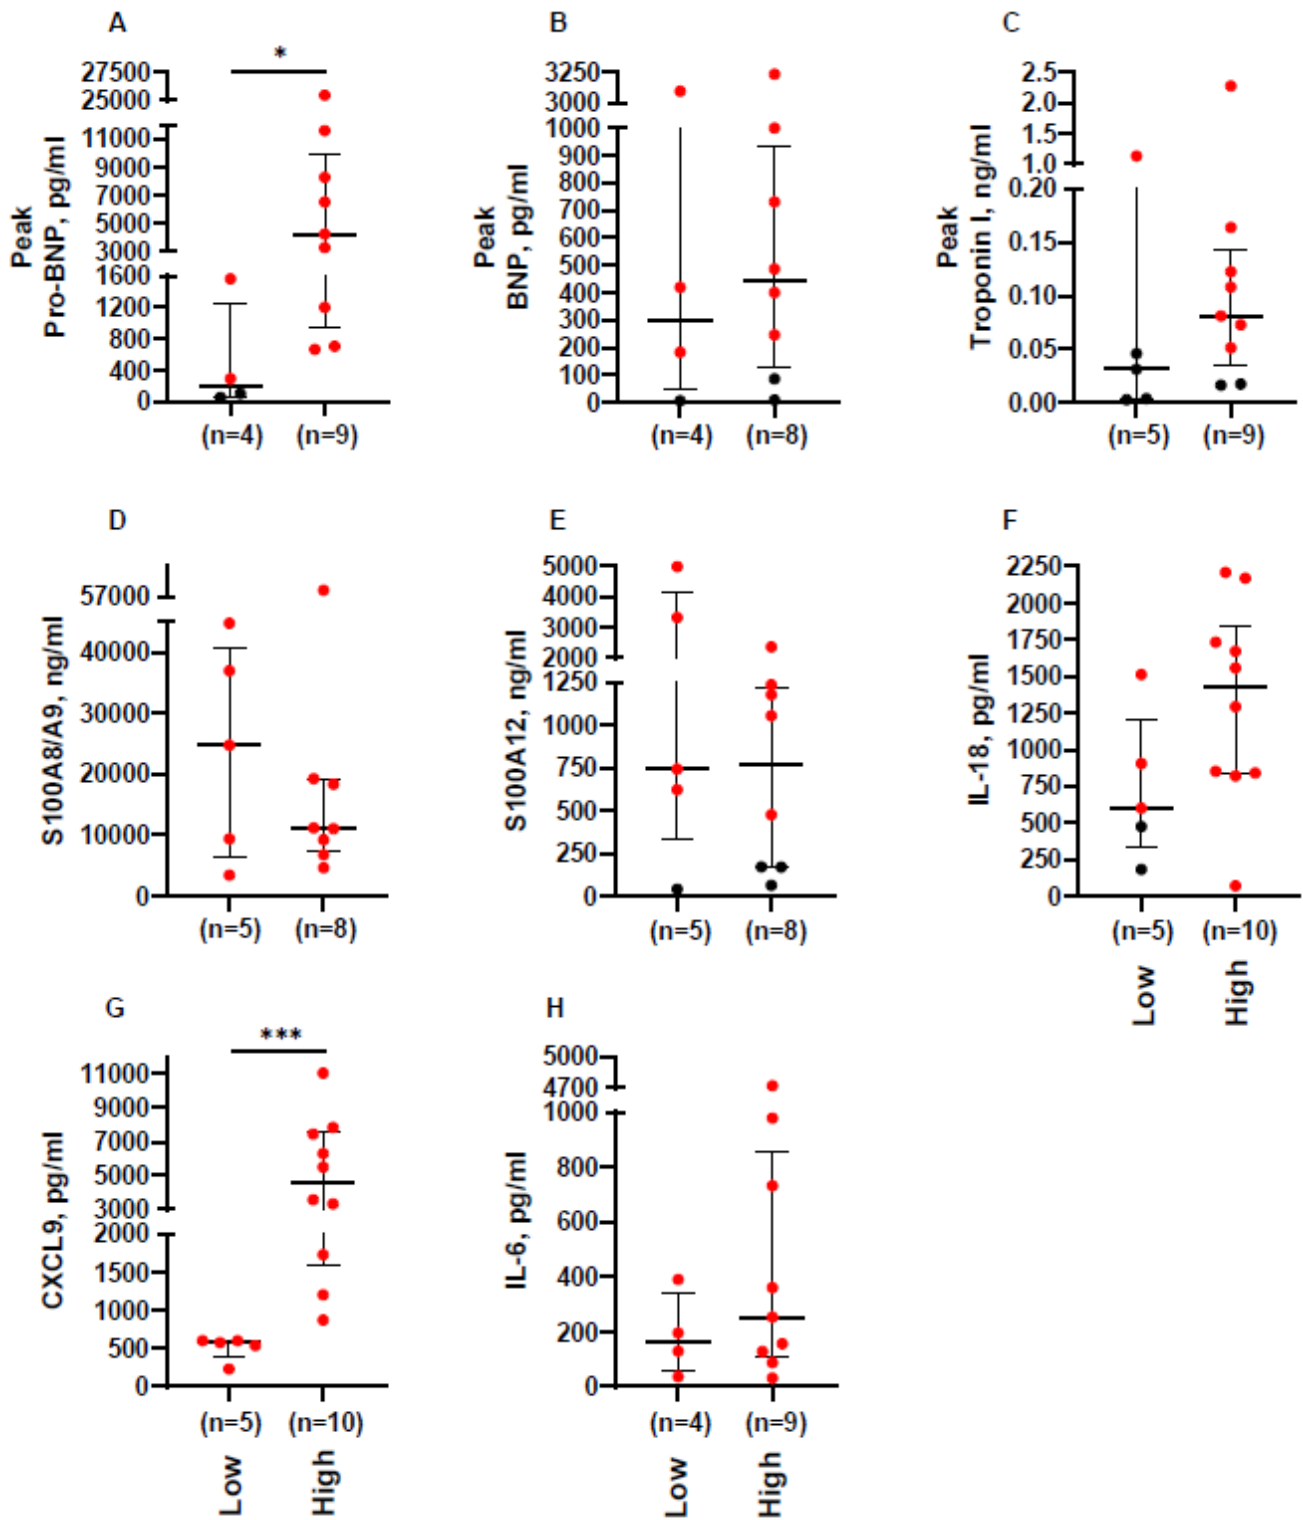

**Appendix Figure 3: Cardiac markers and S100 proteins, cytokine and chemokines in MIS-C stratified by CXCL9 levels.** All data are first sets of labs obtained during admission except for (A-C) which peak values are shown during admission. Red data points indicate outside the normal range for specific study. Data analyzed using unpaired t test if data was parametric or Mann-Whitney if nonparametric. . Reported are median with 25 and 75% interquartile ranges (IQR) \*  $p \leq 0.05$ , \*\*  $p \leq 0.01$ , \*\*\*  $p \leq 0.001$ , \*\*\*\*  $p \leq 0.0001$

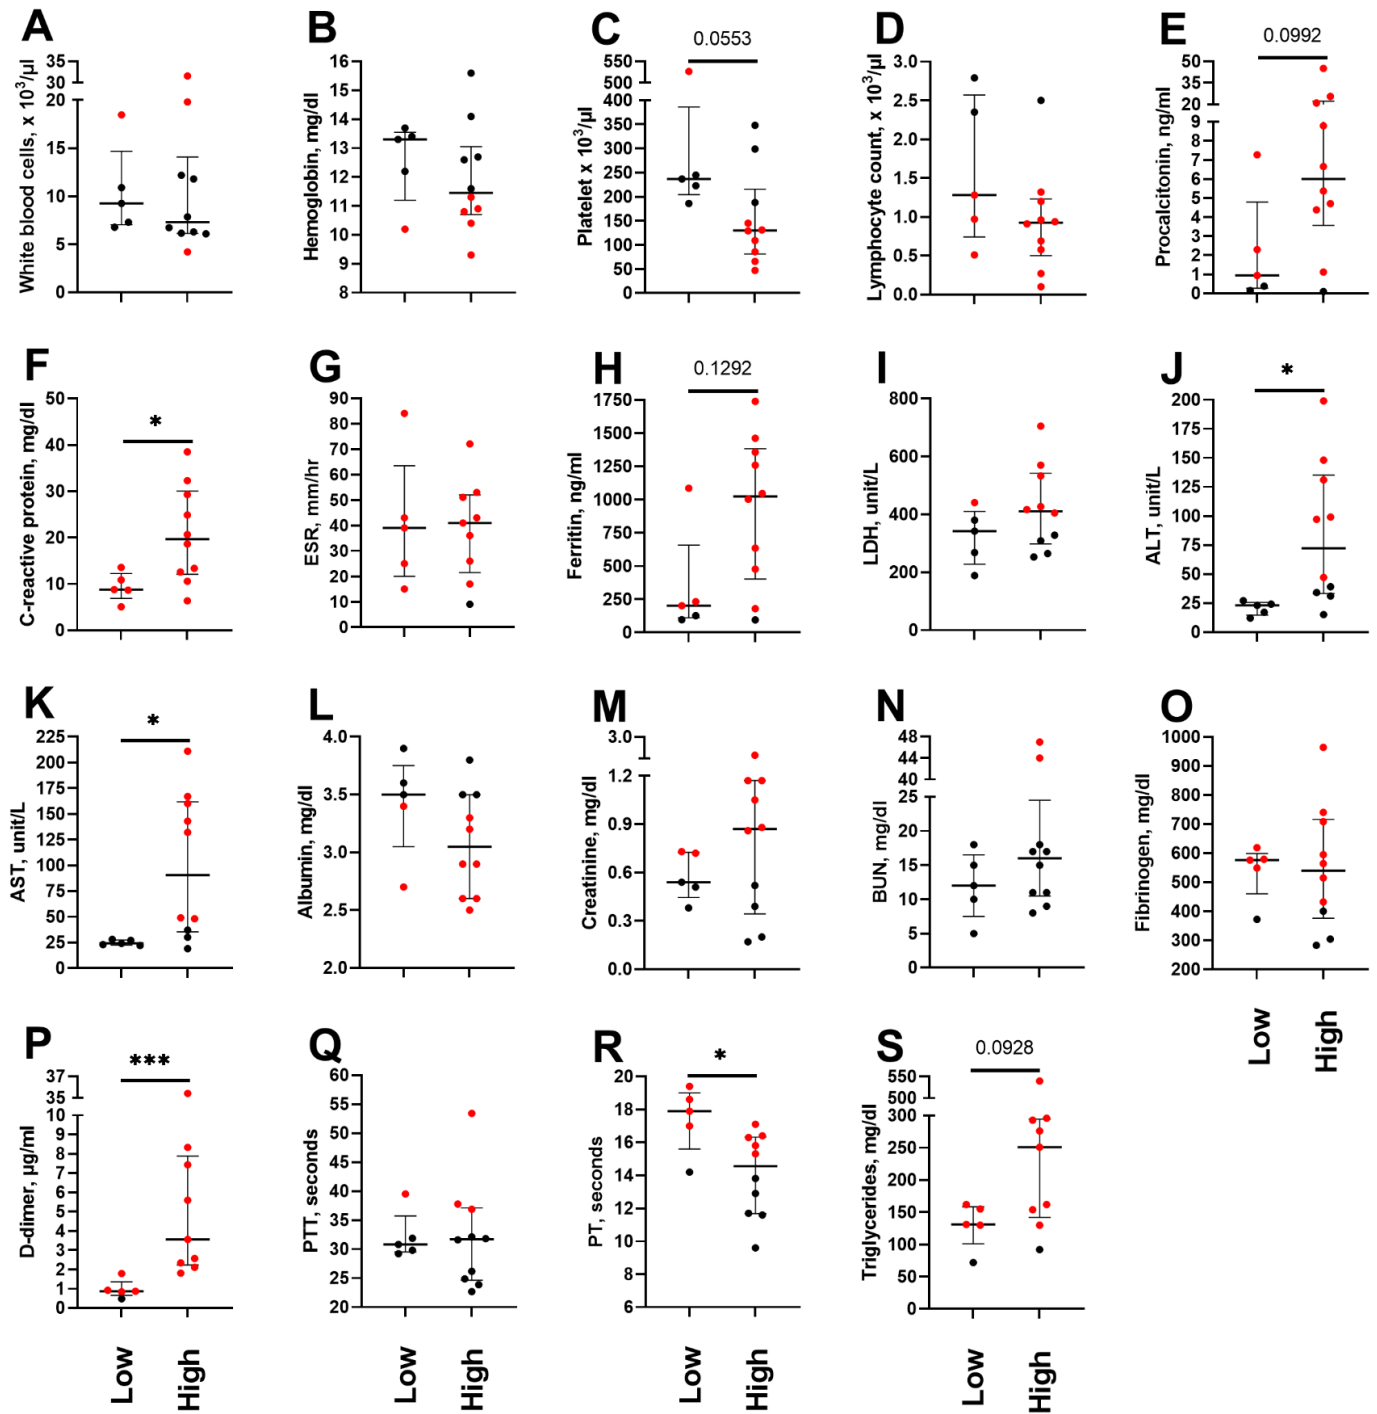

**Appendix figure 4: Hematology and laboratory results in MIS-C patients stratified by CXCL9 levels.** All data are first sets of labs obtained during admission. n=5 low CXCL9 and n=10 high CXCL9 unless otherwise noted. Red data points indicate outside the normal range for specific study. Data was analyzed using unpaired t test if data was parametric or Mann-Whitney if nonparametric. Reported are median with 25 and 75% interquartile ranges (IQR). \*  $p \leq 0.05$ , \*\*  $p \leq 0.01$ , \*\*\*  $p \leq 0.001$ , \*\*\*\*  $p \leq 0.0001$ .



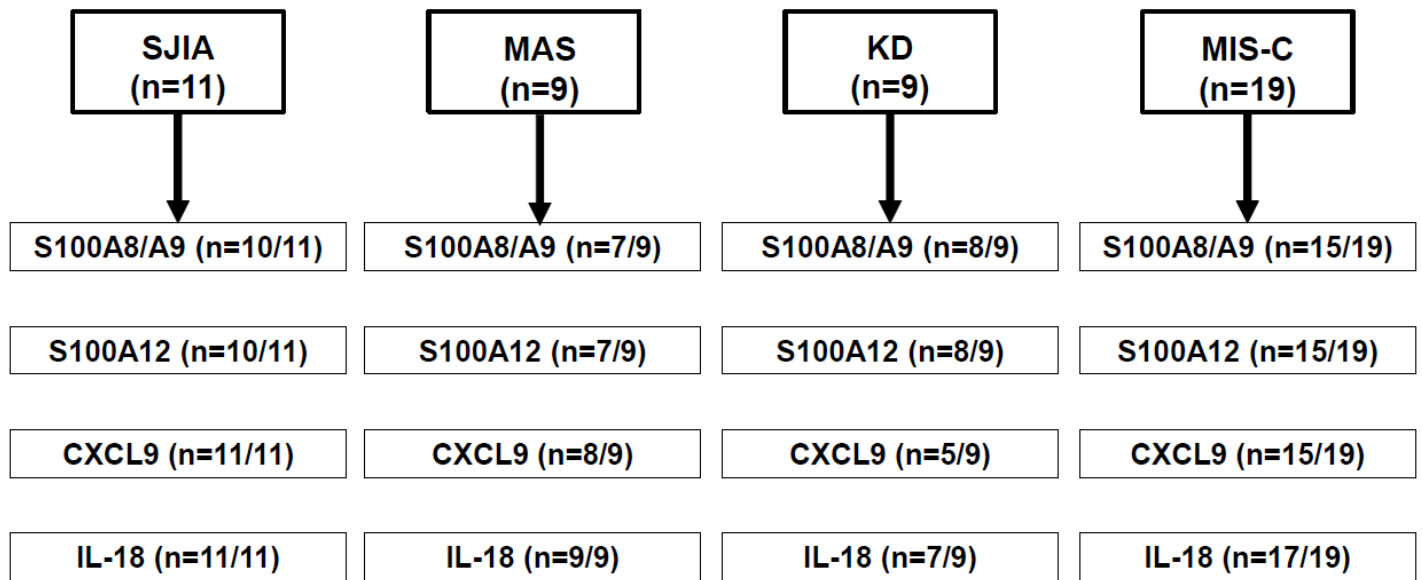

**Appendix Figure 6:** Flow diagram showing patient group and overall sample number for specific biomarkers.
